# Supplementary material for: A question of norms and control—factors shaping sustainable energy behavior: a study among various university stakeholders
Source: Springer Nature journal article supplement (doi:10.1007/s11612-024-00744-6), 2024-05-02
Supplement: MOESM1 [file 27056876]

Table A1. Descriptives and correlations of the included scales from the longitudinal sample.

| Scale                           | Longitudinal sample |       | Correlations |         |         |         |         |         |         |
|---------------------------------|---------------------|-------|--------------|---------|---------|---------|---------|---------|---------|
|                                 | M                   | SD    | 1            | 2       | 3       | 4       | 5       | 6       | 7       |
| 1. Personal norm                | 4.478               | 0.538 | .645***      |         |         |         |         |         |         |
| 2. Injunctive social norm       | 2.824               | 0.973 | .301***      | .396*** |         |         |         |         |         |
| 3. Descriptive social norm      | 2.820               | 0.855 | -.203**      | .348*** | .479*** |         |         |         |         |
| 4. Perceived behavioral control | 3.216               | 0.780 | .280***      | .304*** | .168*   | .569*** |         |         |         |
| 5. Identification               | 2.883               | 0.835 | .041         | .125    | .226**  | .225**  | .531*** |         |         |
| 6. Energy saving intention      | 4.093               | 0.767 | .484***      | .261*** | .106    | .494*** | .187*   | .530*** |         |
| 7. Energy saving behavior       | 3.991               | 0.666 | .286***      | .143    | .076    | .409*** | .177*   | .497*** | .584*** |

Annotations: Means (M) and standard deviations (SD) reported were assessed at t1 for the longitudinal sample. The correlations below the diagonal are intercorrelations of the variables at t1 and in the diagonal are the retest-correlations (t1 and t2) \*  $p < .05$ , \*\*  $p < .01$ , \*\*\*  $p < .001$ .
